# Supplementary material for: The role of emission reductions and the meteorological situation for air quality improvements during the COVID-19 lockdown period in Central Europe
Source: Copernicus journal article supplement (doi:10.5194/acp-2021-372), 2021-06-08
Supplement: Supplementary file [file acp-2021-372-AC2-supplement.pdf]

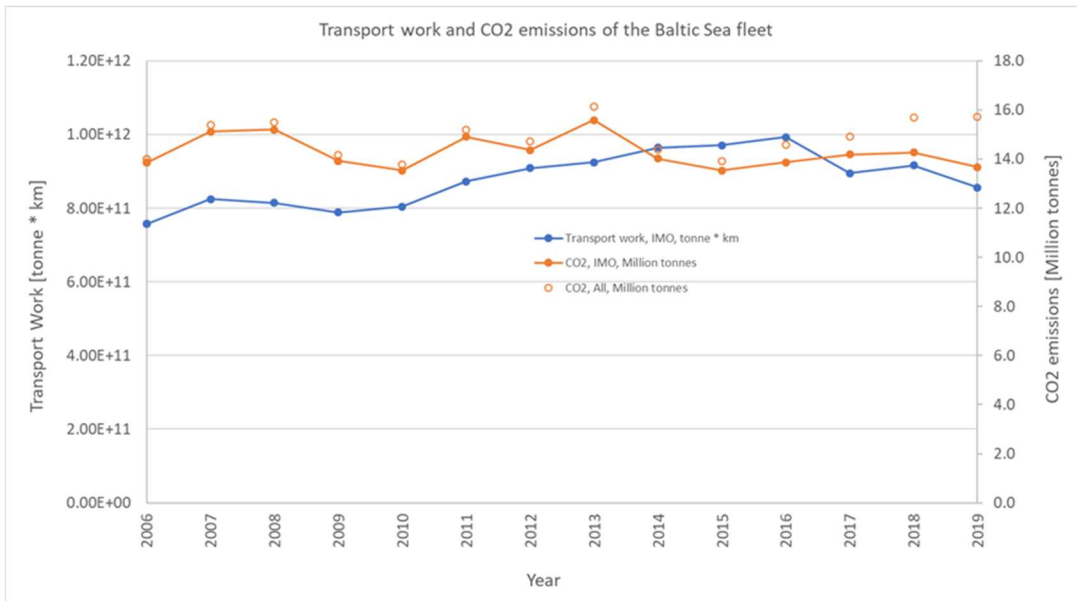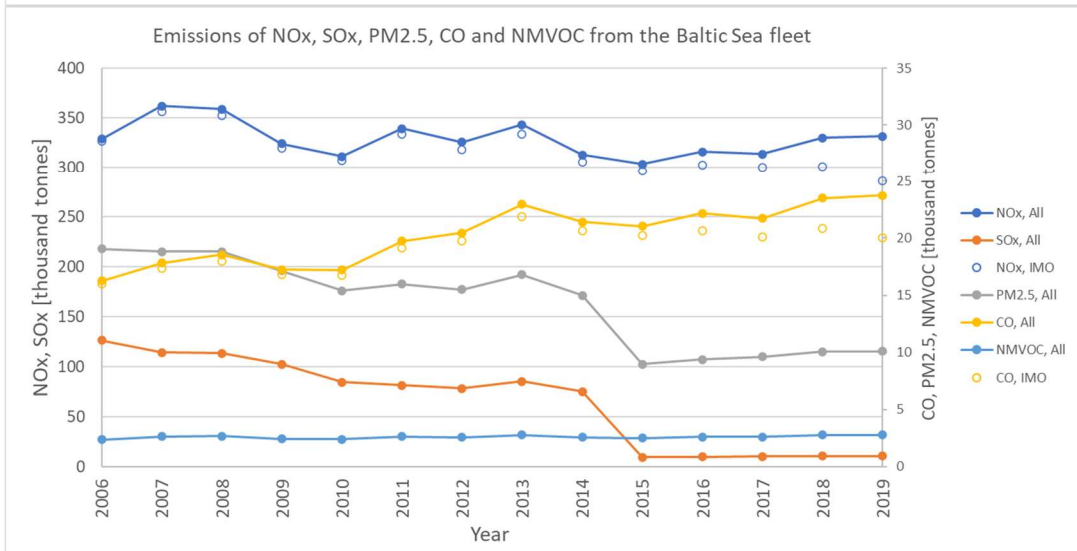

Development of shipping emissions and transport work in the Baltic Sea according to HELCOM.  
[https://portal.helcom.fi/meetings/MARITIME%2020-2020-787/Documents/Presentation%204\\_Ship%20emissions%20in%20the%20Baltic%20Sea%20area%202006%20-%202019.pdf](https://portal.helcom.fi/meetings/MARITIME%2020-2020-787/Documents/Presentation%204_Ship%20emissions%20in%20the%20Baltic%20Sea%20area%202006%20-%202019.pdf)
